# Supplementary material for: Efficient syntheses of pterulone, pterulone B and related analogues
Source: Royal Society of Chemistry journal article supplement (doi:10.1039/b306356a), 2003-01-01
Supplement: b306356a.doc [file b306356a.doc]

Efficient syntheses of Pterulone, Pterulone B and related analogues

Philippe Lemaire, *a* Geneviève Balme,**a* Philippe Desbordes*b* and Jean-Pierre Vors*b*

a Laboratoire de Chimie Organique 1, CNRS UMR 5622, Université Claude Bernard, Lyon I, CPE. 43, Bd du 11 Novembre 1918, 69622 Villeurbanne, France.Fax: 04 72 43 12 14; Tel: 04 72 44 14 16; E-mail: balme@univ-lyon1.fr

b Bayer CropScience 14-20 Rue Pierre Baizet 69009 Lyon, France.

This submission was created using the RSC Article Template (DO NOT DELETE THIS TEXT)

(LINE INCLUDED FOR SPACING ONLY - DO NOT DELETE THIS TEXT)

Paper B306356A

Further experimental details: synthesis and characterisation of compounds **6a**, **9a**-**12a**, **14**, **19**, **20**, **22a**, **22b**, **23a**,**b**, **25b**, **27a**,**b**, **28a**,**b, 29a**,**b**, **30**-**33**.

1-[3-benzenesulfonylmethyl-4-(2-chloromethyl-allyloxy)-phenyl]-ethanone 9a and bis-ether 10a

Following the same procedure described for the preparation of compound **9b**, 1-(3-benzenesulfonylmethyl-4-hydroxy-phenyl)-ethanone (2.5 g, 8.62 mmol), tetrabutylammonium iodide (3.18 g, 8.62 mmol), potassium carbonate (3.02 g, 21.5 mmol) and 3-chloro-2-chlomethyl-1-propene (2.6 mL, 21.5 mmol), in N,N-dimethyl formamide (150 mL). Purification (ethyl acetate / petroleum ether, 2:3), gave the title compound **9a** (1.75 g, 53%) as a white solid, *R*f 0.46 (ethyl acetate / petroleum ether 1:1); mp: 95-96°C; (Found: C, 59.91; H, 5.01. C19H19ClO4S requires C, 60.23; H, 5.05%); max(KBr)/cm-1 3120, 3085, 3000, 2950, 2910, 1700, 1600, 1510, 1440, 1310, 1270, and 1150; **H(300 MHz; CDCl3; Me4Si) 2.52 (3H, s, COCH3), 4.14 (2H, s, CH2Cl), 4.46 (2H, s, CH2SO2Ph), 4.52 (2H, s, OCH2), 5.28 (1H, s, one of C=CH2), 5.41 (1H, s, one of C=CH2), 6.8 (1H, d, *J* = 8.85 Hz, C(5)-H), 7.47 (2H, m, SO2Ph), 7.6 (3H, m, SO2Ph), 7.89 (1H, d, *J* = 2.07 Hz, C(2)-H); 7.96 (1H, dd, *J* = 8.67, 2.2 Hz, C(6)-H); **C(75 MHz; CDCl3; Me4Si) 26.4,44.9, 56.40, 68.40, 111.45, 117.2, 118.15, 128.65, 128.9, 130.4, 131.2, 133.3, 133.8, 138.45, 139.55, 160.2, 196.2.

Di-ether **10a** (yellow-white solid, 794 mg, 22%), *R*f 0.32 (ethyl acetate / petroleum ether, 4:1); mp: 164-170°C; max(KBr)/cm-1 3080, 3000, 2930, 1680, 1610, 1580, 1500, 1440, 1420, 1360, 1310, 1270, and 1140; **H(300 MHz; CDCl3; Me4Si) 2.46 (3H, s, COCH3), 4.48 (2H, s, CH2SO2Ph), 4.57 (2H, s, OCH2), 5.40 (2H, s, C=CH2), 6.95 (1H, d, *J* = 8.67 Hz, C(5)-H), 7.45 (2H, m, SO2Ph), 7.6 (4H, m, SO2Ph and C(2)-H), 7.94 (1H, dd, *J* = 8.64, 2.25 Hz, C(6)-H); **C(75 MHz; CDCl3; Me4Si) 26.7, 57.0, 69.35, 112.0, 117.1, 117.4, 129.0, 129.35, 130.6, 131.7, 133.45, 134.2, 138.7, 138.7, 160.8, 196.45.

1-[3-benzenesulfonylmethyl-4-(2-iodomethyl-allyloxy)-phenyl]-ethanone 11a

Following the same procedure described for the preparation of compound **11b**, compound **9a** (1.67 g, 4.41 mmol), sodium iodide (992 mg, 6.61 mmol), acetone (45 mL), gave the title compound **11a** (1.965 g, 95%) as a white solid, *R*f 0.56 (ethyl acetate / petroleum ether, 3:2); max(KBr)/cm-1 3040, 2920, 1680, 1600, 1500, 1430, 1360, 1310, 1240, and 1140; **H(300 MHz; CDCl3; Me4Si) 2.48 (3H, s, COCH3), 3.95 (2H, s, CH2I), 4.99 (4H, 2s, CH2SO2Ph and OCH2), 5.19 (1H, s, one of C=CH2), 5.47 (1H, s, one of C=CH2), 6.84 (1H, d, *J* = 8.67 Hz, C(5)-H), 7.44 (2H, m, SO2Ph), 7.60 (3H, m, SO2Ph), 7.73 (1H, d, *J* = 2.25 Hz, C(2)-H), 7.93 (dd, *J* = 8.67, 2.25 Hz, C(6)-H); **C(75 MHz; CDCl3; Me4Si) 5.15, 26.7, 56.8, 69.45, 111.8, 117.2, 117.5, 129.05, 129.3, 130.8, 131.5, 133.25, 134.15, 138.8, 141.2, 160.6, 196.5.

1-(5-bezenesulfonyl-3-methylene-2,3,4,5-tetrahyro-benzo[*b*]oxepin-7-yl)-ethanone 6a and dimeric product 12a

Following the same procedure described for the preparation of compound **6b**, compound **9a** (100 mg, 0.264 mmol), dry THF (20 mL), lithium bromide (23 mg, 0.263 mmol), 1.06 M solution of lithium bis(trimethylsilyl)amide in THF (528 L, 0.528 mmol), purification (ethyl acetate / petroleum ether, 2:5) gave compound **6a** (70 mg, 78%) as a white solid, *R*f 0.46 (ethyl acetate / petroleum ether, 1:1); mp: 124-125°C; max(KBr)/cm-1 3080, 2980, 2940, 1670, 1600, 1490, 1440, 1360, 1310, 1250, and 1140; **H(300 MHz; CDCl3; Me4Si) 2.45 (3H, s, COCH3), 2.99 (1H, dd, *J* = 14.1, 7.1 Hz, C(4)-Ha), 3.23 (1H, dd, *J* = 14.1, 7.1 Hz, C(4)-Hb), 4.24 (1H, d, *J* = 13.4 Hz, C(2)-Ha), 4.47 (1H, t, *J* = 7.14 Hz, C(5)-H), 4.77 (1H, d, *J* = 13.4 Hz, C(2)-Hb), 5.01 (1H, s, one of C=CH2), 5.10 (1H, s, one of C=CH2), 7.0 (1H, d, *J* = 8.28 Hz, C(9)-H), 7.45 (2H, m, SO2Ph), 7.63 (3H, m, SO2Ph), 7.76 (1H, d, *J* = 2.07 Hz, C(6)-H), 7.88 (dd, *J* = 8.46, 2.0 Hz, C(8)-H); **C(75 MHz; CDCl3; Me4Si) 26.8,32.15, 69.7, 77.4, 116.7, 123.6, 124.15, 129.25, 129.8, 131.1, 133.3, 134.4, 135.2, 137.1, 141.2, 163.1, 196.7; m/z (CI) 343 (MH+, 100), 201 (MH-PhSO2H+, 100%); found MH+ 343.10032. C19H19O4S requires 343.09258.

compound **12a**

*R*f 0.3 (ethyl acetate / petroleum ether, 3:5);**H(300 MHz; CDCl3; Me4Si) 2.58 (3H, s, COCH3), 3.10 (1H, dd, *J* = 13.77, 10.38 Hz, PhSO2CH-C*H2*a), 3.46 (1H, dd, *J* = 13.92, 5.64 Hz, PhSO2CH-C*H2*b), 3.72 (1H, d, *J* = 10.74 Hz, O-C*H2*a), 3.96 (1H, d, *J* = 10.92 Hz, O-C*H2*b), 5.03 (1H, s, one of C=CH2), 5.22 (1H, s, one of C=CH2), 5.38 (1H, dd, *J* = 10.17, 5.64 Hz, C*H*-SO2Ph), 6.19 (1H, d, *J* = 8.64 Hz, C(9)-H), 7.36 (2H, m, SO2Ph), 7.52 (1H, m, SO2Ph), 7.63 (3H, m, C(8)-H and SO2Ph), 8.14 (1H, d, *J* = 2.25 Hz, C(6)-H); **C(75 MHz; CDCl3; Me4Si) 26.85, 32.8, 60.85, 73.95, 110.8, 121.5, 123.3, 128.75, 129.7, 130.4, 130.55, 131.2, 133.7, 138.05, 138.3, 160.3, 196.6.

3-oxo-2,3-dihydro-benzo[*b*]oxepine-7-carboxylic acid methyl ester 13b

Following the same procedure described for the preparation of compound **13a**, compound **6b** (52 mg, 0.145 mmol), DBU (23 l, 0.152 mmol), dichloromethane (20 mL) gave the title compound **13b** (33 mg, quantitative) as a white solid, *R*f 0.36 (ethyl acetate / petroleum ether, 1:4); mp: 89-93°C; (Found: C, 65.89; H, 4.72. C12H10O4 requires C, 66.05; H, 4.62%); max(KBr)/cm-1 3050, 2950, 2840, 1720, 1670, 1620, 1590, 1490, 1440, and 1250; **H(300 MHz; CDCl3; Me4Si) 3.93 (3H, s, OCH3), 4.60 (2H, s, C(2)-H), 6.42 (1H, d, *J* = 12.0 Hz, C(4)-H), 7.25 (2H, m, C(5)-H and C(9)-H), 8.0 (1H, dd, *J* = 8.49, 2.07 Hz, C(8)-H), 8.1 (1H, d, J = 2.07 Hz, C(6)-H); **C(75 MHz; CDCl3; Me4Si) 52.7, 77.9, 121.4, 126.7, 127.4, 130.3, 133.7, 135.8, 141.8, 162.6, 166.1, 196.0.

3-Chloromethylene-2,3-dihydro-benzo[*b*]oxepine-7-carboxylic acid methyl ester 14

Following the same procedure described for the preparation of Pterulone **(2)**, (chloromethyl)triphenylphosphonium chloride (122 mg, 0.353 mmol), 2M *n*-BuLi (164 L, 0.327 mmol), compound **13b** (55 mg, 0.252 mmol), purification (ethyl acetate / petroleum ether 5:95) gave the title compound **14** as a 85/15 *Z/E* mixture (61 mg, 96%). Yellow-white solid, *R*f 0.41 (ethyl acetate / petroleum ether, 1:9); mp: 72-77°C; (Found: C, 62.16; H, 4.55. C13H11ClO3 requires C, 62.29; H, 4.42%); max(KBr)/cm-1 3090, 2950, 1700, 1600, 1500, 1420 1225 and 1000; **H(300 MHz; CDCl3; Me4Si) *Z* isomer 3.89 (3H, s, OCH3), 4.88 (2H, s, C(2)-H), 6.37 (3H, s, C(4)-H and C(5)-H and C=CHCl), 7.0 (1H, d, *J* = 8.46 Hz, C(9)-H), 7.83 (1H, dd, *J* = 8.49, 2.25 Hz, C(8)-H), 7.93 (1H, d, *J* = 2.25 Hz, C(6)-H); **H(300 MHz; CDCl3; Me4Si) *E* isomer 3.89 (3H, s, OCH3), 4.58 (2H, s, C(2)-H), 6.15 (1H, s, C=CHCl), 6.57 (1H, d, *J* = 11.85 Hz, C(4)-H), 6.85 (1H, d, *J* = 11.85 Hz, C(5)-H), 7.0 (1H, d, *J* = 8.46 Hz, C(9)-H), 7.83 (1H, dd, *J* = 8.49, 2.25 Hz, C(8)-H), 7.93 (1H, d, *J* = 2.25 Hz, C(6)-H); **C(75 MHz; CDCl3; Me4Si) *Z* isomer 52.5, 68.5, 120.8, 121.6, 125.6, 127.8, 128, 129.0, 130.6, 134.9, 138.2, 163.1, 166.8.

To a solution of a 85/15 *Z*/*E* mixture (16 mg, 0.064 mmol) in heptane (2.4 mL) was added a crystal of iodine. After 5 h of stirring under reflux, the solution was cooled to room temperature and was then quenched with a saturated sodium thiosulfate solution. The mixture was extracted three times with dichloromethane. The combined organic layers were washed with brine, dried over magnesium sulfate and concentrated under reduced pressure to give the title compound **14** as a 30/70 mixture of *Z* and *E* isomers (14 mg, 88%) with no more purification.

5-Benzenesulfonyl-5-benzyl-3-methylene-2,3,4,5-tetrahydro-benzo[*b*]oxepine-7-carboxylic acid methyl ester 19

Following the same procedure described for the preparation of compound **21b**, compound **6b** (80 mg, 0.220 mmol), DMPU (30 L, 0.240 mmol), LHMDS (246 L, 0.240 mmol), and ethylbromide (18.5 L, 0.240 mmol). Purification (ethyl acetate / petroleum ether, 1:4) gave the title compound **19** (50 mg, 58%) as a colorless oil, *R*f 0.3 (ethyl acetate / petroleum ether, 1:4); (Found: C, 65.27; H, 6.04. C21H22O5S requires C, 65.27; H, 5.74%); max(film)/cm-1 3090, 2970, 1725, 1610, 1490, 1450, 1300, 1250 and 1140; **H(300 MHz; CDCl3; Me4Si) 0.97 (3H, t, *J* = 7.3 Hz, C*H3*CH2), 2.41 (2H, q, *J* = 7.3 Hz, CH3C*H2*), 3.17 (1H, d, *J* = 14.1 Hz, C(4)-Ha), 3.25 (1H, d, *J* = 14.1 Hz, C(4)-Hb), 3.83 (3H, s, OCH3), 4.28 (1H, d, *J* = 14.7 Hz, C(2)-Ha), 4.58 (1H, d, *J* = 14.7 Hz, C(2)-Hb), 4.86 (1H, s, one of C=CH2), 5.02 (1H, s, one of C=CH2), 6.82 (1H, d, J = 8.5 Hz, C(9)-H), 7.35 (5H, m, SO2Ph), 7.85 (1H, dd, *J* = 8.46, 2 Hz, C(8)-H), 8.08 (1H, d, *J* = 2.07 Hz, C(6)-H); **C(75 MHz; CDCl3; Me4Si) 9.13, 29.91, 36.91, 52.64, 73.03, 76.89, 113.89, 123.76, 126.46, 127.0, 129.70, 130.95, 132.10, 134.01, 134.25, 136.23, 142.84, 164.20, 166.63.

5-Benzenesulfonyl-3-methylene-5-vinyl-2,3,4,5-tetrahydro-benzo[*b*]oxepine-7-carboxylic acid methyl ester 20

Following the same procedure described for the preparation of compound **21b**, compound **6b** (61 mg, 0.170 mmol), DMPU (23 L, 0.189 mmol), LHMDS (189 L, 0.189 mmol), and allylbromide (16.5 L, 0.189 mmol). Purification (ethyl acetate / petroleum ether, 1:4) gave the title compound **20** (45 mg, 67%) as a white solid, *R*f 0.4 (ethyl acetate / petroleum ether, 1:4); mp: 118-121°C; max(KBr)/cm-1 3090, 2970, 1725, 1610, 1490, 1450, 1300, 1250 and 1140; **H(300 MHz; CDCl3; Me4Si) 3.25 (4H, m, C(4)-H and C*H2*CH=CH2), 3.9 (3H, s, OCH3), 4.25 (1H, d, *J* = 14.3 Hz, C(2)-Ha), 4.6 (1H, d, *J* = 14.3 Hz, C(2)-Hb), 4.93 (1H, s, one of C=CH2), 5.10 (1H, s, one of C=CH2), 5.21 (2H, m, CH=C*H2*), 5.83 (1H, m, C*H*=CH2), 6.86 (1H, d, *J* = 8.5 Hz, C(9)-H), 7.4 (4H, m, SO2Ph), 7.57 (1H, m, SO2Ph), 7.95 (1H, dd, *J* = 8.46, 2.0 Hz, C(8)-H), 8.21 (1H, d, *J* = 2.07 Hz, C(6)-H).

**C(75 MHz; CDCl3; Me4Si) 36.8, 41.2, 52.7, 71.8, 77.1, 115.1, 120.8, 123.85, 126.6, 127.5, 128.7, 130.95, 132.3, 132.6, 134.1, 134.1, 135.95, 141.8, 163.55, 166.55.

5-benzyl-3-oxo-2,3-dihydro-benzo[b]oxepine-7-carboxylic acid methyl ester 22b

Following the same procedure described for the preparation of compound **13a**, compound **21b** (83 mg, 0.185 mmol), DBU (29 L, 0.194 mmol gave the title compound **22b** (57 mg, 99%) as a white solid, *R*f 0.6 (ethyl acetate / petroleum ether, 3:7); max(KBr)/cm-1 3060, 3020, 2950, 2840, 1720, 1670, 1610, 1490, 1440, 1280 and 1250; **H(300 MHz; CDCl3; Me4Si) 3.9 (3H, s, OCH3), 4.05 (2H, s, PhCH2), 4.57 (2H, s, C(2)-H), 6.35 (1H, s, C(4)-H), 7.24 (6H, m, C(9)-H and CH2Ph), 7.98 (1H, dd, *J* = 8.5, 2.25 Hz, C(8)-H), 8.33 (1H, d, *J* = 2.07 Hz, C(6)-H); **C(75 MHz; CDCl3; Me4Si) 44.4, 52.7, 79.9, 122.4, 127.2, 127.4, 129.3, 129.4, 130.3, 131.7, 131.8, 132.8, 132.8, 137.5, 150.2, 162.4, 166.3, 199.5; m/z (CI) 309 (MH+, 100%), 310 (20); found MH+ 309.11268. C19H17O4 requires 309.1049.

7-Acetyl-5-benzyl-benzo[*b*]oxepine-3-one 22a

Following the same procedure described for the preparation of compound **13a**, compound **21a** (215 mg, 0.497 mmol), DBU (78.02 L, 0.521 mmol) gave the title compound **22a** (146 mg, quantitative) as a white solid, *R*f 0.18 (ethyl acetate / petroleum ether, 1:4); mp: 97-98°C; (Found: C, 77.50; H, 5.61. C19H16O3 requires C, 78.06; H, 5.52%); max(KBr)/cm-1 3080, 3000, 2960, 2890, 1680, 1610, 1600, 1500, 1360, 1310 and 1250; **H(300 MHz; CDCl3; Me4Si) 2.51 (3H, s, COCH3), 4.06 (2H, s, PhCH2), 4.57 (2H, s, C(2)-H), 6.39 (1H, s, C(4)-H), 7.23 (6H, m, C(9)-H and CH2Ph), 7.9 (1H, dd, *J* = 8.5, 2.25 Hz, C(8)-H), 8.2 (1H, d, *J* = 2.07 Hz, C(6)-H); **C(75 MHz; CDCl3; Me4Si) 26.85, 44.7, 79.8, 122.45, 127.5, 129.25, 129.3, 130.2, 130.6, 131.7, 132.1, 134.45, 137.6, 149.9, 162.5, 196.65, 199.35.

5-benzyl-3-chloromethylene-2,3-dihydro-benzo[*b*]oxepine-7-carboxylic acid methyl ester 23b

Following the same procedure described for the preparation of Pterulone **(2)**, (chloromethyl)triphenylphosphonium chloride (79 mg, 0.227 mmol), *n*-BuLi (0.21 mmol), compound **22b** (50 mg, 0.162 mmol). Purification (ethyl acetate / petroleum ether, 5:95) gave the title compound **23b** as a 80/20 *Z*/*E* mixture. Yellow-white oil (33 mg, 60%), *R*f 0.32 (ethyl acetate / petroleum ether, 5:95); max(film)/cm-1 3060, 3020, 3000, 2940, 1710, 1600, 1570, 1480, 1430, and 1250; **H(300 MHz; CDCl3; Me4Si) *Z* isomer 3.88 (3H, s, OCH3), 3.97 (2H, s, PhCH2), 4.93 (2H, s, C(2)-H), 6.25 (1H, s, C=CHCl), 6.38 (1H, s, C(4)-H), 7.10 (1H, d, *J* = 8.46 Hz, C(9)-H), 7.2 (5H, m, Ph), 7.84 (1H, dd, *J* = 8.3, 2.07 Hz, C(8)-H), 8.22 (1H, d, *J* = 2.07 Hz, C(6)-H); **H(300 MHz; CDCl3; Me4Si) *E* isomer 3.87 (3H, s, OCH3), 4.08 (2H, s, PhCH2), 4.60 (2H, s, C(2)-H), 6.13 (1H, s, C=CHCl), 7.06 (1H, s, C(4)-H), 7.03 (1H, d, *J* = 8.46 Hz, C(9)-H), 7.2 (5H, m, Ph), 7.84 (1H, dd, *J* = 8.3, 2.07 Hz, C(8)-H), 8.30 (1H, d, *J* = 2.07 Hz, C(6)-H); **C(75 MHz; CDCl3; Me4Si) *Z* isomer 44.8,52.5, 70.1, 119.6, 121.7, 126.1, 126.9, 129.0, 129.1, 130.0, 130.4, 130.5, 131.6, 134.4, 139.0, 139.5, 151.4, 163.8; m/z (CI) 341 (MH+, 100%), 343 (28); found MH+ 341.0945. C20H18ClO3 requires 341.0866.

1-(3-Methylene-2,3,4,5-tetrahydro-benzo[*b*]oxepin-7-yl)-ethanol 30 and 2,3-Bis-(-methylene-2,3,4,5-tetrahydro-benzo[*b*]oxepin-7-yl)-butane-2,3-diol 31

Following the same procedure described for the preparation of compound **24b**, compound **21a** (389 mg, 1.14 mmol), sodium phosphate dibasic (NaH2PO4) (648 mg, 4.55 mmol), 5% sodium amalgam (3.14 g, 6.82 mmol) gave the title compounds **30** *R*f 0.55 (50% ethyl acetate / petroleum ether, 2:3) and **31**. *R*f 0.62 (ethyl acetate / petroleum ether, 2:3) as a colorless oil (**30** + **31** = 188.5 mg, 81%). Compound **30** / **31** = 80/20 (NMR ratios).

The mixture was used as is with no further purification.

3-chloromethylene-2,3,4,5-tetrahydro-benzo[*b*]oxepine-7-carboxylic acid methyl ester 28b

Following the same procedure described for the preparation of Pterulone **(2)**, (chloromethyl)triphenylphosphonium chloride (132 mg, 0.382 mmol), *n*-Buli (0.354 mmol), compound **26b** (60 mg, 0.272 mmol), purification (ethyl acetate / petroleum ether, 1:9) gave the title compound **28b** as a 65/35 *Z*/*E* mixture (52 mg, 76%). Colorless oil. Yield considering 6 mg of starting material recovered: 85%, *R*f 0.43 (ethyl acetate / petroleum ether, 1:9; max(film)/cm-1 3090, 2970, 1720, 1610, 1580, 1490 and 1430; **H(300 MHz; CDCl3; Me4Si) *Z* isomer 2.6 (2H, m, C(4)-H), 2.99 (2H, m, C(5)-H), 3.9 (3H, s, OCH3), 4.79 (2H, s, C(2)-H), 6.07 (1H, s, C=CHCl), 7.04 (1H, d, *J* = 8.3 Hz, C(9)-H), 7.84 (2H, m, C(6)-H and C(8)-H); **H(300 MHz; CDCl3; Me4Si) *E* isomer 2.73 (2H, m, C(4)-H), 2.99 (2H, m, C(5)-H), 3.9 (3H, s, OCH3), 4.56 (2H, s, C(2)-H), 6.25 (1H, s, C=CHCl), 6.98 (1H, d, *J* = 8.3 Hz, C(9)-H), 7.84 (2H, m, C(6)-H and C(8)-H); **C(75 MHz; CDCl3; Me4Si) *Z* isomer 32.89, 32.97, 52.40, 71.0, 114.67, 121.65, 125.64, 129.79, 132.40, 132.98, 139.54, 163.63, 167.08; **C(75 MHz; CDCl3; Me4Si) *E* isomer 28.78, 31.53, 52.40, 74.55, 118.10, 121.00, 125.20, 129.97, 131.82, 133.26, 139.40, 163.12, 167.08; m/z (CI) 253 (MH+, 100%), 69 (70), 71 (68), 81 (55); found MH+ 253.06314. C13H14ClO3 requires 253.05532.

1-(3-chloromethylene-2,3,4,5-tetrahydro-benzo[*b*]oxepin-7-yl)-ethanone 28a

Following the same procedure described for the preparation of Pterulone **(2)**, (chloromethyl)triphenylphosphonium chloride (100 mg, 0.29 mmol), *n*-BuLi (0.266 mmol), compound **26a** (49 mg, 0.240 mmol), purification (ethyl acetate / petroleum ether, 15:85) gave a 65/35 *Z*/*E* mixture (41 mg, 72%). Colorless oil, *R*f 0.62 (ethyl acetate / petroleum ether, 3:7); (Found: C, 66.33; H, 5.85. C13H13ClO2 requires C, 65.97; H, 5.54%); max(film)/cm-1 3060, 2940, 2840, 1675, 1600, 1570, 1490, 1430, 1360 and 1250; **H(300 MHz; CDCl3; Me4Si) *Z* isomer 2.57 (3H, s, COCH3), 2.73 (2H, m, C(4)-H), 2.99 (2H, m, C(5)-H), 4.57 (2H, s, C(2)-H), 6.25 (1H, s, C=CHCl), 6.98 (1H, d, *J* = 8.3 Hz, C(9)-H), 7.84 (2H, m, C(6)-H and C(8)-H); **H(300 MHz; CDCl3; Me4Si) *Z* isomer 2.57 (3H, s, COCH3), 2.59 (2H, m, C(4)-H), 2.98 (2H, m, C(5)-H), 4.80 (2H, s, C(2)-H), 6.07 (1H, s, C=CHCl), 7.05 (1H, d, *J* = 8.3 Hz, C(9)-H), 7.76 (2H, m, C(6)-H and C(8)-H); **C(75 MHz; CDCl3; Me4Si) *Z* isomer 26.9, 28.8, 32.9, 70.9, 114.8, 121.6, 128.9, 131.8, 132.4, 133.0, 139.4, 163.7, 197.4; **C(75 MHz; CDCl3; Me4Si) *E* isomer 26.9, 28.8, 31.5, 74.4, 118.2, 121.0, 129.0, 132.1, 132.4, 133.0, 139.3, 163.0, 197.4.

1-(5-Benzyl-3-methylene-2,3,4,5-tetrahydro-benzo[*b*]oxepin-7-yl)-ethanol 32 and 2,3-Bis-(-5-Benzyl-3-methylene-2,3,4,5-tetrahydro-benzo[*b*]oxepin-7-yl)-butane-2,3-diol 33

Following the same procedure described for the preparation of compound **24b**, compound **21a** (366 mg, 0.847 mmol), sodium phosphate dibasic (NaH2PO4) (481 mg, 3.39 mmol), 5% sodium amalgam (2.34 g, 5.08 mmol) gave the title compounds **32** *R*f 0.39 (ethyl acetate / petroleum ether, 1:3) and **33** *R*f 0.37 (ethyl acetate / petroleum ether, 1:3) as a colorless oil (**32** + **33** = 208 mg, 83%). The mixture was used as is in the next step.

5-Benzyl-3-oxo-2,3,4,5-tetrahydro-benzo[*b*]oxepine-7-carboxylic acid methyl ester 27b

Following the same procedure described for the preparation of compound **26b**, compound **25b** (35 mg, 0.113 mmol) gave the title compound **27b** (35 mg, 99%) as colorless oil, *R*f 0.5 (ethyl acetate / petroleum ether, 1:4); (Found: C, 73.35; H, 5.64. C19H18O4 requires C, 73.53; H, 5.85%); max(film)/cm-1 3060, 3020, 2920, 2840, 1720, 1605, 1490, 1430, 1280, and 1260; **H(300 MHz; CDCl3; Me4Si) 2.6 (2H, m, C(4)-Ha and PhCH2a), 2.9 (1H, dd, *J* = 13.7, 4.9 Hz, PhCH2b), 3.1 (1H, dd, *J* = 13.5, 4.9 Hz, C(4)-Hb), 3.44 (1H, m, C(5)-H), 3.9 (3H, s, OCH3), 4.43 (1H, s, C(2)-H), 7.1 (3H, m, C(9)-H and CH2Ph), 7.3 (3H, m, CH2Ph), 7.91 (2H, m, C(6)-H and C(8)-H); **C(75 MHz; CDCl3; Me4Si) 41.0, 44.1, 44.1, 52.6, 79.8, 122.65, 127.0, 127.1, 129.65, 129.0, 130.2, 133.2, 134.4, 138.7, 161.9, 166.75, 210.2.

7-Acetyl-5-benzyl-4,5-dihydro-benzo[b]oxepine-3(2H)-one 27a

Following the same procedure described for the preparation of compound **26a**, compound **32** + **33** (208 mg, 0.707 mmol calculated on **32** molecular weigh) in a mixture of acetonitrile (1.45 mL), carbon tetrachloride (1.45 mL), and water (2.25 mL), periodate hypochlorite (984 mg, 4.59 mmol), ruthenium chloride (3.65 mg, 0.017 mmol), filtration on silica pad, gave the title compound **27a** (112 mg, 56%) as a white solid, *R*f 0.5 (ethyl acetate / petroleum ether, 3:7); mp: 82-83°C; (Found: C, 77.34; H, 6.44. C19H18O3 requires C, 77.53; H, 6.16%); max(KBr)/cm-1 3080, 3020, 2970, 2940, 2920, 2860, 1725, 1680, 1660, 1600, 1490, 1420, 1360, 1310 and 1250; **H(300 MHz; CDCl3; Me4Si) 2.44 (3H, s, COCH3),2.88 (2H, m, C(4)-Ha and PhCH2a), 3.03 (2H, m, C(4)-Hb and PhCH2b), 3.41 (1H, m, C(5)-H), 4.43 (2H, d, *J* = 17.0 Hz, C(2)-Ha-b), 7.11 (3H, m, C(9)-H and CH2Ph), 7.3 (3H, m, CH2Ph), 7.65 (1H, d, *J* = 1.9 Hz, C(6)-H), 7.80 (1H, dd, *J* = 8.5, 2.0 Hz, C(8)-H); **C(75 MHz; CDCl3; Me4Si) 24.6, 38.9, 41.9, 42.2, 77.5, 120.5, 125.0, 126.8, 126.9, 127.5, 130.0, 131.6, 131.8, 136.6, 159.8, 195.0, 207.8.

5-Benzyl-3-methylene-2,3,4,5-tetrahydro-benzo[*b*]oxepine-7-carboxylic acid methyl ester 25b

Following the same procedure described for the preparation of compound **24b**, compound **21b** (84 mg, 0.187 mmol), sodium phosphate dibasic (NaH2PO4) (106 mg, 0.748 mmol), 5% sodium amalgam (344 mg, 0.748 mmol) gave the title compound **25b** (59 mg, quantitative) as a colorless oil, *R*f 0.66 (ethyl acetate / petroleum ether, 1:3); (Found: C, 77.91; H, 6.47. C20H20O3 requires C, 77.90; H, 6.54%); max(film)/cm-1 3060, 3020, 2950, 2840, 1720, 1605, 1490, 1420, 1280, and 1260; **H(300 MHz; CDCl3; Me4Si) 2.49 (2H, d, *J* = 4.53 Hz, C(4)-H), 2.95 (2H, d, *J* = 7.92 Hz, PhCH2), 3.22 (1H, m, C(5)-H), 3.85 (3H, s, OCH3), 4.20 (1H, d, *J* = 12.6 Hz, C(2)-Ha), 4.64 (1H, d, *J* = 12.6 Hz, C(2)-Hb), 4.94 (1H, s, one of C=CH2), 5.12 (1H, s, one of C=CH2), 7.15 (6H, m, C(9)-H and CH2Ph), 7.75 (1H, d, *J* = 2.07 Hz, C(6)-H), 7.83 (1H, dd, *J* = 8.3, 2.07 Hz, C(8)-H); **C(75 MHz; CDCl3; Me4Si) 38.4, 39.8, 45.9, 52.4, 78.0, 117.6, 122.4, 125.9, 126.5, 128.6, 129.5, 130.0, 132.5, 137.5, 140.7, 143.8, 163.6, 167.1.

5-Benzyl-3-chloromethylene-2,3,4,5-tetrahydro-benzo[*b*]oxepine-7-carboxylic acid methyl ester 29b

Following the same procedure described for the preparation of Pterulone **(2)**, (chloromethyl)triphenylphosphonium chloride (40 mg, 0.115 mmol), *n*-BuLi (0.11 mmol), compound **27b** (30 mg, 0.10 mmol), purification (ethyl acetate / petroleum ether, 5:95) gave the title compound **29b** as a 60/40 *Z/E* mixture. Colorless oil (18 mg, 53%), *R*f 0.4 (ethyl acetate / petroleum ether, 5:95); max(film)/cm-1 3060, 3020, 2920, 2840, 1720, 1600, 1570, 1490, 1440, 1280 and 1260; **H(300 MHz; CDCl3; Me4Si) *Z* isomer 2.5 (2H, m, C(4)-H), 3.0 (2H, m, PhCH2), 3.29 (1H, m, C(5)-H), 3.90 (3H, s, OCH3), 4.42 (1H, d, *J* = 14.7 Hz, C(2)-Ha), 5.10 (1H, d, *J* = 14.7 Hz, C(2)-Hb), 5.91 (1H, s, C=CHCl), 7.2 (6H, m, C(9)-H and CH2Ph), 7.8 (2H, m, C(6)-H and C(8)-H); **H(300 MHz; CDCl3; Me4Si) *E* isomer 2.6 (2H, m, C(4)-H), 2.95 (2H, m, PhCH2), 3.29 (1H, m, C(5)-H), 3.87 (3H, s, OCH3), 4.28 (1H, d, *J* = 14.7 Hz, C(2)-Ha), 4.66 (1H, d, *J* = 14.7 Hz, C(2)-Hb), 6.32 (1H, s, C=CHCl), 7.12 (6H, m, C(9)-H and CH2Ph), 7.8 (2H, m, C(6)-H and C(8)-H); **C(75 MHz; CDCl3; Me4Si) *Z* isomer 30.1, 39.8, 45.7, 52.4, 71.7, 116.3, 122.6, 126.2, 122.6, 126.7, 128.8, 129.4, 132.9, 136.3, 137.1, 140.0, 163.2, 167.0; **C(75 MHz; CDCl3; Me4Si) *E* isomer 36.5, 41.0, 45.3, 52.4, 76.3, 119.6, 122.5, 126.0, 122.6, 126.7, 128.8, 129.4, 132.55, 136.7, 137.6, 140.2, 163.1, 167.0; m/z (CI) 343 (MH+, 100%), 345 (35); found MH+ 343.1102. C20H20ClO3 requires 343.1023.

1-(5-Benzyl-3-chloromethylene-2,3,4,5-tetrahydro-benzo[*b*]oxepin-7yl)ethanone 29a

Following the same procedure described for the preparation of Pterulone **(2)**, (chloromethyl)triphenylphosphonium chloride (106 mg, 0.305 mmol), *n*-BuLi (0.280 mmol), compound **27a** (75 mg, 0.255 mmol). Purification (ethyl acetate / petroleum ether, 15:85) gave compound **29a** as a 65/35 *Z*/*E* mixture. Colorless oil (68 mg, 82%), *R*f 0.53 (ethyl acetate / petroleum ether, 1:4); (Found: C, 73.36; H, 6.11. C20H19ClO2 requires C, 73.50; H, 5.86%); max(film)/cm-1 3060, 3020, 3000, 2920, 2840, 1680, 1600, 1570, 1490, 1440, 1360, and 1260; **H(300 MHz; CDCl3; Me4Si) *Z* isomer 2.48 (3H, s, COCH3), 2.6 (2H, m, C(4)-H), 2.95 (2H, m, PhCH2), 3.29 (1H, m, C(5)-H), 4.45 (1H, d, *J* = 14.7 Hz, C(2)-Ha), 5.10 (1H, d, *J* = 14.7 Hz, C(2)-Hb), 5.94 (1H, s, C=CHCl), 7.12 (6H, m, C(9)-H and CH2Ph), 7.61 (1H, d, *J* = 2.07 Hz, C(6)-H), 7.76 (1H, m, C(8)-H); **H(300 MHz; CDCl3; Me4Si) *E* isomer 2.44 (3H, s, COCH3), 2.6 (2H, m, C(4)-H), 2.95 (2H, m, PhCH2), 3.29 (1H, m, C(5)-H), 4.26 (1H, d, *J* = 14.7 Hz, C(2)-Ha), 4.7 (1H, d, *J* = 14.7 Hz, C(2)-Hb), 6.34 (1H, s, C=CHCl), 7.12 (6H, m, C(9)-H and CH2Ph), 7.49 (1H, d, *J* = 2.07 Hz, C(6)-H), 7.76 (2H, m, C(8)-H); **C(75 MHz; CDCl3; Me4Si) *Z* isomer 26.8, 36.8, 41.2, 45.6, 71.7, 116.3, 122.6, 126.7, 128.8, 129.5, 129.0, 131.9, 133.3, 136.0, 137.0, 140.0, 163.3, 197.4; **C(75 MHz; CDCl3; Me4Si) *E* isomer 26.8, 33.1, 39.95, 46.15, 76.3, 119.7, 122.4, 126.5, 128.6, 129.5, 128.9, 131.7, 133.3, 136.4, 137.55, 140.25, 163.2, 197.4.

**Single Column Figure/Scheme**

X

**Fig./Scheme XX** Caption.

X

**Fig./Scheme XX** Caption.

**Double Column Figure/Scheme**

**Single Column Uncaptioned Graphic/Unnumbered Equation**

X

**Double Column Uncaptioned Graphic**

X

**Numbered Equation**

| X | (X) |
| --- | --- |

**Single Column Table**

**Table XX** Caption

| X |
| --- |

*a* Footnote text.

**Double Column Table**

**Table XX** Caption

| X |
| --- |

*a* Footnote text.
